# Supplementary material
Source: publisher site journal article supplement (https://www.spandidos-publications.com/7413/downloadSupplementary)
Supplement: Supplementary file 1 [file downloadSupplementary]

**Table SI.** Sequences of primers used in the study.

| <b>Gene</b>  | <b>Forward (5'-3')</b>      | <b>Reverse (5'-3')</b>          |
|--------------|-----------------------------|---------------------------------|
| <i>GLUT1</i> | TCC ACG AGC ATC TTC GAG A   | ATA CTG GAA GCA ACT GCC C       |
| <i>GLUT2</i> | CTA CTC AAC CAG CAT TTT TC  | AAC ACA TAA GGT CCA CAG AA      |
| <i>HK1</i>   | GCG CAG CTC CTG GCC TAT TAC | TGT TGG ATT AAA ATC CCG GGA     |
| <i>HK2</i>   | TCG CAT CTG CTT GCC TAC TTC | CTT CTG GAG CCC ATT GTC CGT     |
| <i>HK3</i>   | GAG TGT GTG AGC GGC ACC CC  | GGT GGC CCG GAC GAA AGT GG      |
| <i>HK4</i>   | TGG ACC AAG GGC TTC AAG GC  | CAT GTA GCA GGC ATT GCA GCC     |
| <i>SMCT1</i> | CCT CAC CGC TAG CTT C       | ATC TTC CAC CAT CAT AGG CA      |
| <i>HIF1A</i> | CTC AAA GTC GGA CAG CCT CA  | CCC TGC AGT AGG TTT CTG CT      |
| <i>ACTB</i>  | GTG GGG CGC CCC AGG CAC CA  | CTC CTT AAT GTC ACG CAC GAT TTC |

**Table SII.** Sequences of siRNAs used in the study.

| <b>siRNA</b>     | <b>Species</b>      | <b>Sequences (5'-3')</b>                                                                 | <b>Company</b> |
|------------------|---------------------|------------------------------------------------------------------------------------------|----------------|
| <i>GLUT1</i>     | <i>Homo sapiens</i> | Sense: GAG ACU UCC AAA CCU GAC A<br>Antisense: CAG GUU UGG AAG UCU C                     | Bioneer        |
| <i>GLUT2</i>     | <i>Homo sapiens</i> | Sense: UAU AAA UAU UUG UUG CAU CCU CAG G<br>Antisense: CCU GAG GAU GCA ACA AAU AUU UAU A | MBiotech       |
| <i>HIF1A</i>     | <i>Homo sapiens</i> | Sense: GGG UAA AGA ACA AAA CAC A<br>Antisense: UGU GUU UUG UUC UUU ACC C                 | Bioneer        |
| Negative control | <i>Homo sapiens</i> | Sense: CCU ACG CCA CCA AUU UCG U<br>Antisense: ACG AAA UUG GUG GCG UAG G                 | Bioneer        |

**Table SIII.** Transcripts upregulated by glucosamine in A549 cell line.

| <b>Gene ontology</b>                          | <b>Gene symbols</b>                                                                                                                                                                                            | <b>Median fold change<br/>(range)</b> |
|-----------------------------------------------|----------------------------------------------------------------------------------------------------------------------------------------------------------------------------------------------------------------|---------------------------------------|
| Carbohydrate metabolism                       | <i>NDUFA4L2, PCK2, DHDH, SLC3A2, CYP4F12, C16orf7, GFPT1, SLC33A1, GBGT1, SLC16A4, HKDC1, PFKFB4, SLC2A6</i>                                                                                                   | 2.47 (2.04-7.65)                      |
| Nucleic acid, protein, and lipid biosynthesis | <i>PLA2G4C, CBS, C9orf95, CYP39A1, ASNS, HMGCS1, SLC6A6, CHST1, TPK1, SLC27A1, ANG, SC4MOL, UPP1, ABTB1, GMPPA, OSBP2, P4HA2, SC5DL, MVD, ACOT2, MOCOS, CERCAM, PYCRI, SPHK1, RETSAT, DAGLB, DCI, HSD17B14</i> | 2.21 (2.01-5.17)                      |
| Glycosylation                                 | <i>ALG5, TNIP1, CCNO, ALG12, SMPDL3A, UGCG</i>                                                                                                                                                                 | 2.06 (2.00-2.61)                      |
